# Supplementary material for: Two-dimensional bricklayer arrangements of tolans using halogen bonding interactions
Source: Royal Society of Chemistry journal article supplement (doi:10.1039/c5cc02225h), 2015-01-01
Supplement: c5cc02225h1.pdf [file c5cc02225h1.pdf]

Electronic Supplementary Information for

**Two-Dimensional Bricklayer Arrangements of Tolans Using  
Halogen Bonding Interactions**

Fanny Frausto, Zachary C. Smith, Terry E. Haas, and Samuel W. Thomas III<sup>\*a</sup>

Department of Chemistry, Tufts University, 62 Talbot Avenue, Medford, MA 02155

<sup>\*</sup>To whom correspondence should be addressed. E-mail: [sam.thomas@tufts.edu](mailto:sam.thomas@tufts.edu)

## General Procedures

All reactions were performed under standard air-free conditions under an atmosphere of argon gas with magnetic stirring unless otherwise mentioned. Flash chromatography was performed using silica gel (230-400 mesh) as the stationary phase. Commercial reagents and solvents were used as received, unless otherwise noted.

## Instrumentation

Proton nuclear magnetic spectra ( $^1\text{H}$  NMR) were acquired on a Bruker Avance III 500 or Bruker DPX-300 spectrometer. The spectra are reported in parts per million on the  $\delta$  scale, and are referenced from the residual protium in the NMR solvent ( $\text{CDCl}_3$ :  $\delta$  7.24 ( $\text{CHCl}_3$ )). Data are reported as follows: chemical shift [multiplicity (s = singlet, d = doublet, t = triplet, m = multiplet), coupling constant(s) in Hertz, integration]. Carbon nuclear magnetic spectra ( $^{13}\text{C}$  NMR) were acquired on a Bruker Avance III 500 or Bruker DPX-300 spectrometer and referenced from the carbon references of the solvent ( $\text{CDCl}_3$ :  $\delta$  77.16 ( $\text{CHCl}_3$ )). Data are reported as follows: chemical shift. Fluorine-19 nuclear magnetic resonance ( $^{19}\text{F}$  NMR) spectra were acquired on a Bruker Avance III 500 or Bruker DPX-300 spectrometer.

## X-ray Crystallography.

Single crystals suitable from X-Ray crystallography were prepared by slow evaporation of a mixture of ethyl acetate and hexanes (Compound **1** and **3**), dichloromethane and methanol (Compound **2**), dichloromethane and hexanes (Compound **4**, **5**, **6**). Low-temperature diffraction data were collected on a Bruker-D8 Quest diffractometer coupled to a Photon CMOS detector with Mo  $K\alpha$  radiation ( $\lambda = 0.71073 \text{ \AA}$ ) from a fine-focused sealed tube source, performing  $\phi$ - and  $\omega$ -scans. The structures were solved by direct methods using SHELXS<sup>1</sup> and refined against  $F^2$  on all data by full-matrix least squares with SHELXL-97<sup>2</sup> following established refinement strategies.<sup>3</sup> All non-hydrogen atoms were refined anisotropically; all hydrogen atoms were included into the model at geometrically calculated positions and refined using a riding model. The isotropic displacement parameters of all hydrogen atoms were fixed to 1.2 times the U value of the atoms they are linked to. Details of the data quality, and refinement statistics are listed in Tables S1 to S6. Compound **1** was solved as a two component twin, the unit cells were found with CELL\_NOW<sup>4</sup>, its absorption correction was found by TWINABS<sup>5</sup>, and the BASF refined to 0.479. Compound **2** was solved as a two component twin and the BASF refined to 0.0614. Compound **3** was refined without low angle reflections and reflections near the beamstop using OMIT function. Compound **5** was solved as a two component twin with twin law of [100 0-10 00-1] and the BASF refined to 0.46.

## Powder X-ray Diffraction.

Low-temperature powder diffraction data were at collected at 100 K on a Bruker-AXS X8 Kappa Duo diffractometer coupled to a Smart Apex2 CCD detector with Cu  $K\alpha$  radiation ( $\lambda = 1.54184 \text{ \AA}$ ) from a  $\text{I}\mu\text{S}$  micro source.

## Calculations

Molecular geometries used in electrostatic potential maps were taken from the XRD cif files of each molecule. All DFT calculations were carried out in Gaussian 09<sup>6</sup> using the B3LYP functional and 6-311+G(d,p) basis set. Iodine was treated with DGDZVP basis set. The electrostatic potential maps were calculated with an isoValue of 0.0004.

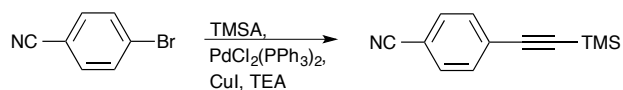

### Synthesis of 4-(trimethylsilyl)ethynylbenzonitrile (**S2**)

A 250 mL round bottom flask was charged with 4-bromobenzonitrile (1.82 g, 10 mmol, 1.0 eq),  $\text{PdCl}_2(\text{PPh}_3)_2$  (250 mg, 0.36 mmol, 0.036 eq), and  $\text{CuI}$  (10 mg, 0.05 mmol, 0.005 eq) and evacuated and refilled with argon. The flask was then charged with  $\text{Et}_3\text{N}$  (45 mL) and trimethylsilylacetylene (1.7 mL, 12 mmol, 1.2 eq) was added dropwise over 5 minutes. The reaction mixture was left to stir at room temperature for 16 hours. The mixture was filtered through Celite and the filtrate was concentrated. The crude product was purified by flash column chromatography on silica gel (eluent: 5% ethyl acetate in hexanes) to afford **S2** as an off-white solid (1.85g, 93% yield). NMR showed agreement with the same compound reported in the literature.<sup>7</sup>

$^1\text{H}$  NMR (500 MHz,  $\text{CDCl}_3$ ):  $\delta$  7.57 (d,  $J = 8$  Hz, 2H), 7.51 (d,  $J = 8$  Hz, 2H), 0.24 (s, 9H)

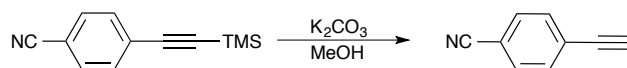

### Synthesis of 4-ethynylbenzonitrile (**S3**)

To a solution of **S2** (500. mg, 2.51 mmol, 1.0 eq) in methanol (7 mL) was added potassium carbonate (25 mg, 0.18 mmol, 0.07 eq). The resultant mixture was stirred at room temperature for 30 minutes. The mixture was concentrated, redissolved in EtOAc (20 mL) and washed with 10% HCl (5 mL) and brine (5 mL). The organic layer was dried with MgSO<sub>4</sub> and concentrated to afford a white solid **S3** (281 mg, 88% yield) that was used without further purification. NMR showed agreement with the same compound reported in the literature.<sup>7</sup>

<sup>1</sup>H NMR (500 MHz, CDCl<sub>3</sub>):  $\delta$  7.59 (d, J = 8 Hz), 7.55 (d, J = 8 Hz), 3.28 (s, 1H)

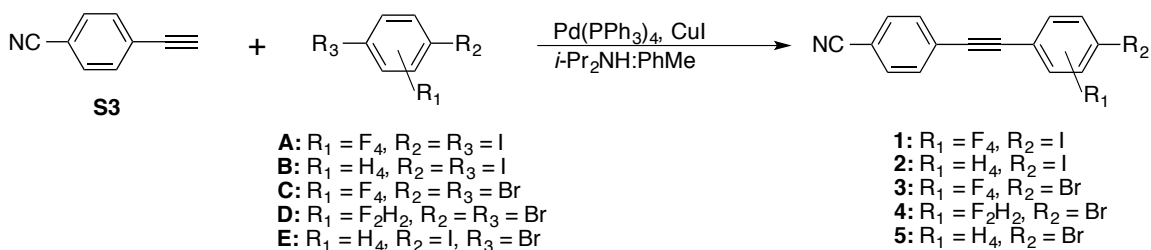

### General Procedure for Sonogashira Coupling (1-6)

A round bottom flask was charged with 1 eq 4-ethynylbenzonitrile, excess aryl halide,  $\text{Pd(PPh}_3)_2\text{Cl}_2$  or  $\text{Pd(PPh}_3)_4$ , and  $\text{CuI}$  and evacuated and refilled with argon three times, and dissolved in solvent. All solvents were sparged with argon for  $\geq 20$  minutes prior to use. The reaction solution was stirred for 16 hours at the temperatures specified. The mixture was concentrated *in vacuo* and the crude product was immobilized on silica and purified using flash chromatography on silica gel to afford the coupled product.

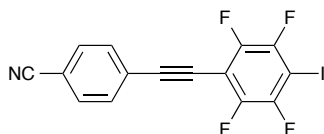

### Synthesis of 4-(2-(4-iodotetrafluorophenyl)ethynyl)-benzonitrile 1.

**S3** (200. mg, 1.57 mmol, 1.0 eq), 1,4-diiodotetrafluorobenzene (3.15 g, 7.85 mmol, 5.0 eq),  $\text{Pd(PPh}_3)_4$  (54 mg, 0.047 mmol, 0.03 eq),  $\text{CuI}$  (21 mg, 0.11 mmol, 7%) dissolved in a 1:2 mixture of diisopropylamine and toluene (5.6 mL and 11.2 mL, respectively). This was heated to 50 °C and left to stir for 16 hours. The crude product was purified twice by flash column chromatography on silica gel (once with eluent: 100% hexanes, then gradient to 10% ethyl acetate in hexanes and once with eluent: gradient of 5% to 10% ethyl acetate in hexanes) to afford **1** as yellow solid (114 mg, 20% yield). XRD crystal was obtained by slow evaporation in ethyl acetate hexanes solution.

$^1\text{H}$  NMR (500 MHz,  $\text{CDCl}_3$ ):

$\delta$  7.67 (s)

$^{13}\text{C}$  NMR (500 MHz,  $\text{CDCl}_3$ )

$\delta$  147.3 (ddt,  $J = 4.7, 14.3, 244$  Hz), 146.1 (ddt,  $J = 3.9, 16.3, 255$  Hz), 132.6, 132.4, 126.4, 118.2, 113.3, 104.6 (tt,  $J = 2.3, 18.8$  Hz), 100.2 (t,  $J = 3.7$  Hz) 78.5 (t,  $J = 4.2$  Hz), 74.6 (t,  $J = 27.7$  Hz)

$^{19}\text{F}$  NMR (470 MHz,  $\text{CDCl}_3$ )

$\delta$  119.53-119.60 (m), 134.14-134.21(m)

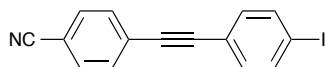

**Synthesis of 4-(2-(4-iodophenyl)ethynyl)benzonitrile **2**.**

**S3** (250 mg, 1.97 mmol, 1.0 eq), 1,4-diiodobenzene (3.25 g, 9.85 mmol, 5.0 eq), Pd(PPh<sub>3</sub>)<sub>4</sub> (116 mg, 0.10 mmol, 0.05 eq), CuI (19 mg, 0.10 mmol, 0.05 eq) dissolved in a 1:2 mixture of diisopropylamine and toluene (7 mL and 14 mL, respectively). This mixture was heated to 50 °C and left to stir for 16 hours. The crude product was purified twice by flash column chromatography on silica gel (eluent: 3% ethyl acetate in hexanes) to afford **2** as white solid (142 mg, 22% yield). NMR showed agreement with the same compound reported in the literature.<sup>8</sup> XRD crystal was obtained by slow evaporation of a solution of dichloromethane and methanol.

<sup>1</sup>H NMR (500 MHz, CDCl<sub>3</sub>): δ 7.70 (d, J = 8.5 Hz, 2H), 7.62 (d, J = 8.5 Hz, 2H), 7.57 (d, J = 8.5 Hz, 2H), 7.24 (d, J = 8.5 Hz, 2H)

<sup>13</sup>C NMR (125 MHz, CDCl<sub>3</sub>): δ 137.7, 133.2, 132.1, 132.1, 127.9, 121.7, 118.5, 111.8, 95.32, 92.76, 89.03

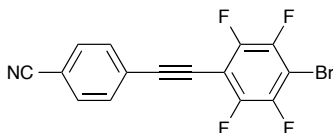

**Synthesis of 4-(2-(4-bromotetrafluorophenyl)ethynyl)-benzonitrile **3**.**

**S3** (250 mg, 1.57 mmol, 1.0 eq), dibromotetrafluorobenzene (3.03 g, 9.85 mmol, 5.0 eq), Pd(PPh<sub>3</sub>)<sub>4</sub> (116 mg, 0.10 mmol, 0.05 eq), CuI (19 mg, 0.10 mmol, 0.05 eq) dissolved in a 1:2 mixture of diisopropylamine and toluene (7 mL and 14 mL, respectively). This was heated to 50 °C and left to stir for 16 hours. The crude product was purified twice by flash column chromatography on silica gel (eluent: 5% ethyl acetate in hexanes) to afford **3** as white solid (179 mg, 32% yield). XRD crystal was obtained by slow evaporation of a solution of ethyl acetate and hexanes.

<sup>1</sup>H NMR (500 MHz, CDCl<sub>3</sub>): δ 7.67 (m)

<sup>13</sup>C NMR (125 MHz, CDCl<sub>3</sub>): δ 148.1-148.0 (m), 146.0-145.9(m), 144.2-144.0 (m), 133.6, 132.4, 126.4, 118.2, 113.3, 100.1, 99.9, 78.1

<sup>19</sup>F NMR (470 MHz, CDCl<sub>3</sub>): δ 132.44 (m), 134.55 (m)

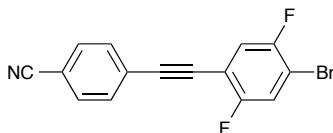

**Synthesis of 4-(2-(4-bromo-2,5-difluorophenyl)ethynyl)benzonitrile 4.**

**S3** (152 mg, 1.13 mmol, 1.0 eq), 1,4-dibromo-2,5-difluorobenzene (616 mg, 2.27 mmol, 2.0 eq), Pd(PPh<sub>3</sub>)<sub>4</sub> (65 mg, 0.06 mmol, 0.05 eq), CuI (11 mg, 0.06 mmol, 0.05 eq) dissolved in a 1:2 mixture of diisopropylamine and toluene (4 mL and 8 mL, respectively). This was heated to 50 °C and left to stir for 16 hours. The crude product was purified by flash column chromatography on silica gel (eluent: 5% ethyl acetate in hexanes) to afford **4** as white solid (104 mg, 29% yield). XRD crystal was obtained by slow evaporation of a solution of dichloromethane and hexanes.

<sup>1</sup>H NMR (500 MHz, (CD<sub>3</sub>)<sub>2</sub>CO): δ 7.88 (d, J = 8.5 Hz, 2H), 7.80 (d, J = 8.5 Hz, 2H), 7.71 (dd, J = 8.5 Hz; J = 6 Hz, 1H), 7.62 (dd, J = 8.5 Hz; J = 6 Hz, 1H)

<sup>13</sup>C NMR (125 MHz, (CD<sub>3</sub>)<sub>2</sub>CO): δ 158.7 (dd, J = 2.5, 393 Hz), 156.7 (dd, J = 2.5, 385 Hz), 133.4, 133.3, 127.5, 121.7 (d, J = 26 Hz), 120.9 (dd, J = 26, 0.6 Hz), 118.8, 113.5, 112.3, (dd, J = 8.8, 18.8 Hz), 111.3 (J = 10, 23.8 Hz), 95.1 (d, J = 3.8 Hz), 85.2 (d, J = 2.5 Hz)

<sup>19</sup>F NMR (470 MHz, (CD<sub>3</sub>)<sub>2</sub>CO): δ 113.96 (m), 114.52 (m)

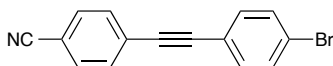

**Synthesis of 4-(2-(4-bromophenyl)ethynyl)benzonitrile **5**.**

**S3** (250 mg, 1.97 mmol, 1.0 eq), 1-bromo-4-iodobenzene (3.25 g, 9.85 mmol, 5.0 eq), Pd(PPh<sub>3</sub>)<sub>4</sub> (116 mg, 0.10 mmol, 0.05 eq), CuI (19 mg, 0.10 mmol, 0.05 eq) dissolved in a 1:2 mixture of diisopropylamine and toluene (7 mL and 14 mL, respectively). This was heated to 50 °C and left to stir for 16 hours. The crude product was purified twice by flash column chromatography on silica gel (eluent: 3% ethyl acetate in hexanes) to afford **2** as white solid (142 mg, 22% yield). NMR showed agreement with the same compound reported in the literature.<sup>9</sup> XRD crystal was obtained by slow evaporation of a solution of dichloromethane and hexanes.

<sup>1</sup>H NMR (500 MHz, CDCl<sub>3</sub>): δ 7.62 (d, J = 8.5, 2H), 7.57 (d, J = 8.5 Hz, 2H), 7.59 (d, J = 8.5, 2H), 7.37 (d, J = 8.5 Hz, 2H)

<sup>13</sup>C NMR (125 MHz, CDCl<sub>3</sub>): δ 133.3, 132.2, 132.2, 132.0, 128.0, 123.7, 121.3, 118.6, 111.9, 92.7, 88.9.

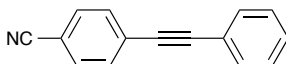

**Synthesis of 4-(2-phenylethynyl)benzonitrile **6**.**

Phenylacetylene (57 mg, 0.55 mmol, 1.0 eq), 4-bromo-benzonitrile (100 g, 0.55 mmol, 1.0 eq), Pd(PPh<sub>3</sub>)<sub>4</sub> (35 mg, 0.03 mmol, 0.05 eq), CuI (6 mg, 0.03 mmol, 0.05 eq) dissolved in a 1:1 mixture of diisopropylamine and toluene (5 mL). This was heated to 50 °C and left to stir for 16 hours. The crude product was purified by flash column chromatography on silica gel (eluent: 15% dichloromethane in hexanes) to afford **6** as white solid (34.5 mg, 31% yield). NMR showed agreement with the same compound reported in the literature.<sup>10</sup> XRD crystal was obtained by slow evaporation of a solution of dichloromethane and hexanes.

<sup>1</sup>H NMR (500 MHz, CDCl<sub>3</sub>): δ 7.62 (d, J = 8.5, 2H), 7.57 (d, J = 8.5 Hz, 2H), 7.59 (m, 2H), 7.37 (m, 3H)

<sup>13</sup>C NMR (125 MHz, CDCl<sub>3</sub>): δ 132.2, 132.2, 131.9, 129.3, 128.6, 128.4, 122.4, 118.6, 111.6, 93.9, 87.9

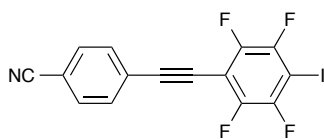

**Table S1.** Crystal data and structure refinement for **1**.

|                                   |                                                   |                 |
|-----------------------------------|---------------------------------------------------|-----------------|
| Identification code               | FF010815cn_0t                                     |                 |
| Empirical formula                 | C <sub>15</sub> H <sub>4</sub> F <sub>4</sub> I N |                 |
| Formula weight                    | 401.09                                            |                 |
| Temperature                       | 100(2) K                                          |                 |
| Wavelength                        | 0.71073 Å                                         |                 |
| Crystal system                    | Triclinic                                         |                 |
| Space group                       | P-1                                               |                 |
| Unit cell dimensions              | a = 7.4665(9) Å                                   | a = 85.468(3)°. |
|                                   | b = 9.3784(11) Å                                  | b = 75.250(3)°. |
|                                   | c = 10.5061(13) Å                                 | g = 67.203(2)°. |
| Volume                            | 655.70(14) Å <sup>3</sup>                         |                 |
| Z                                 | 2                                                 |                 |
| Density (calculated)              | 2.032 Mg/m <sup>3</sup>                           |                 |
| Absorption coefficient            | 2.480 mm <sup>-1</sup>                            |                 |
| F(000)                            | 380                                               |                 |
| Crystal size                      | 0.296 x 0.271 x 0.136 mm <sup>3</sup>             |                 |
| Theta range for data collection   | 2.005 to 41.240°.                                 |                 |
| Index ranges                      | -12 ≤ h ≤ 13, -17 ≤ k ≤ 17, 0 ≤ l ≤ 19            |                 |
| Reflections collected             | 14322                                             |                 |
| Independent reflections           | 7687 [R(int) = 0.0548]                            |                 |
| Completeness to theta = 25.242°   | 99.8 %                                            |                 |
| Absorption correction             | Semi-empirical from equivalents                   |                 |
| Max. and min. transmission        | 0.748124 and 0.612237                             |                 |
| Refinement method                 | Full-matrix least-squares on F <sup>2</sup>       |                 |
| Data / restraints / parameters    | 7696 / 0 / 191                                    |                 |
| Goodness-of-fit on F <sup>2</sup> | 1.017                                             |                 |
| Final R indices [I > 2σ(I)]       | R1 = 0.0416, wR2 = 0.0884                         |                 |
| R indices (all data)              | R1 = 0.0516, wR2 = 0.0917                         |                 |
| Extinction coefficient            | n/a                                               |                 |
| Largest diff. peak and hole       | 3.231 and -2.182 e.Å <sup>-3</sup>                |                 |

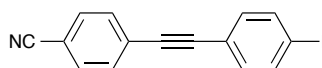

**Table S2.** Crystal data and structure refinement for **2**

|                                   |                                             |          |
|-----------------------------------|---------------------------------------------|----------|
| Identification code               | FF022615OF_Fddd_d                           |          |
| Empirical formula                 | C <sub>15</sub> H <sub>8</sub> I N          |          |
| Formula weight                    | 329.12                                      |          |
| Temperature                       | 100(2) K                                    |          |
| Wavelength                        | 0.71073 Å                                   |          |
| Crystal system                    | Orthorhombic                                |          |
| Space group                       | Fdd2                                        |          |
| Unit cell dimensions              | a = 18.421(3) Å                             | a = 90°. |
|                                   | b = 7.6185(14) Å                            | b = 90°. |
|                                   | c = 17.387(3) Å                             | g = 90°. |
| Volume                            | 2440.1(8) Å <sup>3</sup>                    |          |
| Z                                 | 8                                           |          |
| Density (calculated)              | 1.792 Mg/m <sup>3</sup>                     |          |
| Absorption coefficient            | 2.599 mm <sup>-1</sup>                      |          |
| F(000)                            | 1264                                        |          |
| Crystal size                      | 0.223 x 0.079 x 0.070 mm <sup>3</sup>       |          |
| Theta range for data collection   | 3.122 to 28.937°.                           |          |
| Index ranges                      | -24 ≤ h ≤ 24, -10 ≤ k ≤ 10, -23 ≤ l ≤ 23    |          |
| Reflections collected             | 10033                                       |          |
| Independent reflections           | 1610 [R(int) = 0.0549]                      |          |
| Completeness to theta = 25.242°   | 100.0 %                                     |          |
| Absorption correction             | Semi-empirical from equivalents             |          |
| Max. and min. transmission        | 0.839 and 0.549                             |          |
| Refinement method                 | Full-matrix least-squares on F <sup>2</sup> |          |
| Data / restraints / parameters    | 1610 / 2 / 83                               |          |
| Goodness-of-fit on F <sup>2</sup> | 1.256                                       |          |
| Final R indices [I > 2σ(I)]       | R1 = 0.0406, wR2 = 0.0973                   |          |
| R indices (all data)              | R1 = 0.0503, wR2 = 0.1008                   |          |
| Absolute structure parameter      | 0.06(9)                                     |          |
| Extinction coefficient            | n/a                                         |          |
| Largest diff. peak and hole       | 3.484 and -0.753 e.Å <sup>-3</sup>          |          |

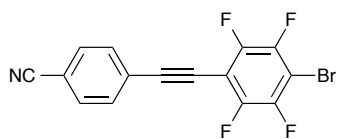

**Table S3.** Crystal data and structure refinement for **3**

|                                   |                                                    |                  |
|-----------------------------------|----------------------------------------------------|------------------|
| Identification code               | RP-4_a                                             |                  |
| Empirical formula                 | C <sub>15</sub> H <sub>4</sub> Br F <sub>4</sub> N |                  |
| Formula weight                    | 354.10                                             |                  |
| Temperature                       | 100(2) K                                           |                  |
| Wavelength                        | 0.71073 Å                                          |                  |
| Crystal system                    | Monoclinic                                         |                  |
| Space group                       | P2 <sub>1</sub> /c                                 |                  |
| Unit cell dimensions              | a = 13.2997(14) Å                                  | a = 90°.         |
|                                   | b = 9.7019(11) Å                                   | b = 102.415(3)°. |
|                                   | c = 19.917(2) Å                                    | g = 90°.         |
| Volume                            | 2509.8(5) Å <sup>3</sup>                           |                  |
| Z                                 | 8                                                  |                  |
| Density (calculated)              | 1.874 Mg/m <sup>3</sup>                            |                  |
| Absorption coefficient            | 3.315 mm <sup>-1</sup>                             |                  |
| F(000)                            | 1376                                               |                  |
| Crystal size                      | 0.742 x 0.153 x 0.096 mm <sup>3</sup>              |                  |
| Theta range for data collection   | 2.620 to 34.971°.                                  |                  |
| Index ranges                      | -21 ≤ h ≤ 21, -15 ≤ k ≤ 15, -32 ≤ l ≤ 32           |                  |
| Reflections collected             | 72556                                              |                  |
| Independent reflections           | 11025 [R(int) = 0.0386]                            |                  |
| Completeness to theta = 25.242°   | 99.8 %                                             |                  |
| Absorption correction             | Numerical                                          |                  |
| Max. and min. transmission        | 0.907 and 0.659                                    |                  |
| Refinement method                 | Full-matrix least-squares on F <sup>2</sup>        |                  |
| Data / restraints / parameters    | 11025 / 0 / 379                                    |                  |
| Goodness-of-fit on F <sup>2</sup> | 1.043                                              |                  |
| Final R indices [I > 2σ(I)]       | R1 = 0.0297, wR2 = 0.0638                          |                  |
| R indices (all data)              | R1 = 0.0479, wR2 = 0.0696                          |                  |
| Extinction coefficient            | n/a                                                |                  |
| Largest diff. peak and hole       | 1.233 and -0.354 e.Å <sup>-3</sup>                 |                  |

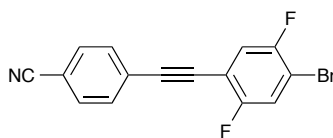

**Table S4.** Crystal data and structure refinement for **4**

|                                   |                                                    |                 |
|-----------------------------------|----------------------------------------------------|-----------------|
| Identification code               | FF0930_P1bar_a                                     |                 |
| Empirical formula                 | C <sub>15</sub> H <sub>6</sub> Br F <sub>2</sub> N |                 |
| Formula weight                    | 318.12                                             |                 |
| Temperature                       | 100(2) K                                           |                 |
| Wavelength                        | 0.71073 Å                                          |                 |
| Crystal system                    | Triclinic                                          |                 |
| Space group                       | P-1                                                |                 |
| Unit cell dimensions              | a = 5.7972(9) Å                                    | a = 73.612(3)°. |
|                                   | b = 8.6736(14) Å                                   | b = 85.418(3)°. |
|                                   | c = 12.715(2) Å                                    | g = 86.061(3)°. |
| Volume                            | 610.70(17) Å <sup>3</sup>                          |                 |
| Z                                 | 2                                                  |                 |
| Density (calculated)              | 1.730 Mg/m <sup>3</sup>                            |                 |
| Absorption coefficient            | 3.373 mm <sup>-1</sup>                             |                 |
| F(000)                            | 312                                                |                 |
| Crystal size                      | 0.162 x 0.205 x 0.468 mm <sup>3</sup>              |                 |
| Theta range for data collection   | 1.673 to 28.879°.                                  |                 |
| Index ranges                      | -7 ≤ h ≤ 7, -11 ≤ k ≤ 11, -17 ≤ l ≤ 17             |                 |
| Reflections collected             | 9756                                               |                 |
| Independent reflections           | 3194 [R(int) = 0.0295]                             |                 |
| Completeness to theta = 25.242°   | 99.5 %                                             |                 |
| Absorption correction             | Semi-empirical from equivalents                    |                 |
| Max. and min. transmission        | 0.5520 and 0.5520                                  |                 |
| Refinement method                 | Full-matrix least-squares on F <sup>2</sup>        |                 |
| Data / restraints / parameters    | 3194 / 0 / 172                                     |                 |
| Goodness-of-fit on F <sup>2</sup> | 1.076                                              |                 |
| Final R indices [I > 2σ(I)]       | R1 = 0.0280, wR2 = 0.0634                          |                 |
| R indices (all data)              | R1 = 0.0359, wR2 = 0.0667                          |                 |
| Extinction coefficient            | n/a                                                |                 |
| Largest diff. peak and hole       | 0.610 and -0.345 e.Å <sup>-3</sup>                 |                 |

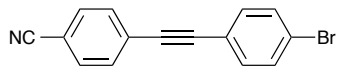

**Table S5.** Crystal data and structure refinement for **5**

|                                   |                                             |          |
|-----------------------------------|---------------------------------------------|----------|
| Identification code               | FF022715MC_Fdd_f                            |          |
| Empirical formula                 | C <sub>15</sub> H <sub>8</sub> Br N         |          |
| Formula weight                    | 282.13                                      |          |
| Temperature                       | 100(2) K                                    |          |
| Wavelength                        | 0.71073 Å                                   |          |
| Crystal system                    | Orthorhombic                                |          |
| Space group                       | Fdd2                                        |          |
| Unit cell dimensions              | a = 17.893(4) Å                             | a = 90°. |
|                                   | b = 7.5409(14) Å                            | b = 90°. |
|                                   | c = 17.168(3) Å                             | g = 90°. |
| Volume                            | 2316.5(8) Å <sup>3</sup>                    |          |
| Z                                 | 8                                           |          |
| Density (calculated)              | 1.618 Mg/m <sup>3</sup>                     |          |
| Absorption coefficient            | 3.522 mm <sup>-1</sup>                      |          |
| F(000)                            | 1120                                        |          |
| Crystal size                      | 0.345 x 0.113 x 0.068 mm <sup>3</sup>       |          |
| Theta range for data collection   | 2.276 to 32.031°.                           |          |
| Index ranges                      | -26<=h<=26, -11<=k<=11, -25<=l<=25          |          |
| Reflections collected             | 14475                                       |          |
| Independent reflections           | 2029 [R(int) = 0.0423]                      |          |
| Completeness to theta = 25.242°   | 100.0 %                                     |          |
| Absorption correction             | Semi-empirical from equivalents             |          |
| Max. and min. transmission        | 0.7960 and 0.3760                           |          |
| Refinement method                 | Full-matrix least-squares on F <sup>2</sup> |          |
| Data / restraints / parameters    | 2029 / 1 / 83                               |          |
| Goodness-of-fit on F <sup>2</sup> | 1.297                                       |          |
| Final R indices [I>2sigma(I)]     | R1 = 0.0314, wR2 = 0.0760                   |          |
| R indices (all data)              | R1 = 0.0402, wR2 = 0.0782                   |          |
| Absolute structure parameter      | 0.018(4)                                    |          |
| Extinction coefficient            | n/a                                         |          |
| Largest diff. peak and hole       | 0.900 and -0.427 e.Å <sup>-3</sup>          |          |

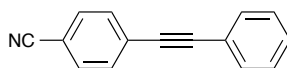

**Table S6.** Crystal data and structure refinement for **6**

|                                   |                                             |                  |
|-----------------------------------|---------------------------------------------|------------------|
| Identification code               | FF1128_P-1_a                                |                  |
| Empirical formula                 | C <sub>15</sub> H <sub>9</sub> N            |                  |
| Formula weight                    | 203.23                                      |                  |
| Temperature                       | 100(2) K                                    |                  |
| Wavelength                        | 0.71073 Å                                   |                  |
| Crystal system                    | Triclinic                                   |                  |
| Space group                       | P-1                                         |                  |
| Unit cell dimensions              | a = 9.404(3) Å                              | a = 94.412(6)°.  |
|                                   | b = 9.480(3) Å                              | b = 102.356(6)°. |
|                                   | c = 13.047(4) Å                             | g = 103.038(6)°. |
| Volume                            | 1097.3(6) Å <sup>3</sup>                    |                  |
| Z                                 | 4                                           |                  |
| Density (calculated)              | 1.230 Mg/m <sup>3</sup>                     |                  |
| Absorption coefficient            | 0.072 mm <sup>-1</sup>                      |                  |
| F(000)                            | 424                                         |                  |
| Crystal size                      | 0.270 x 0.176 x 0.102 mm <sup>3</sup>       |                  |
| Theta range for data collection   | 2.767 to 26.490°.                           |                  |
| Index ranges                      | -11 ≤ h ≤ 11, -11 ≤ k ≤ 11, -16 ≤ l ≤ 16    |                  |
| Reflections collected             | 15077                                       |                  |
| Independent reflections           | 4487 [R(int) = 0.0638]                      |                  |
| Completeness to theta = 25.242°   | 99.3 %                                      |                  |
| Absorption correction             | Semi-empirical from equivalents             |                  |
| Max. and min. transmission        | 0.9820 and 0.9310                           |                  |
| Refinement method                 | Full-matrix least-squares on F <sup>2</sup> |                  |
| Data / restraints / parameters    | 4487 / 0 / 289                              |                  |
| Goodness-of-fit on F <sup>2</sup> | 1.034                                       |                  |
| Final R indices [I > 2σ(I)]       | R1 = 0.0641, wR2 = 0.1753                   |                  |
| R indices (all data)              | R1 = 0.1216, wR2 = 0.2104                   |                  |
| Extinction coefficient            | n/a                                         |                  |
| Largest diff. peak and hole       | 0.305 and -0.256 e.Å <sup>-3</sup>          |                  |

**Supplemental Figure S1.** X-ray crystal structure of **3**, highlighting significant interactions mentioned in the article text.

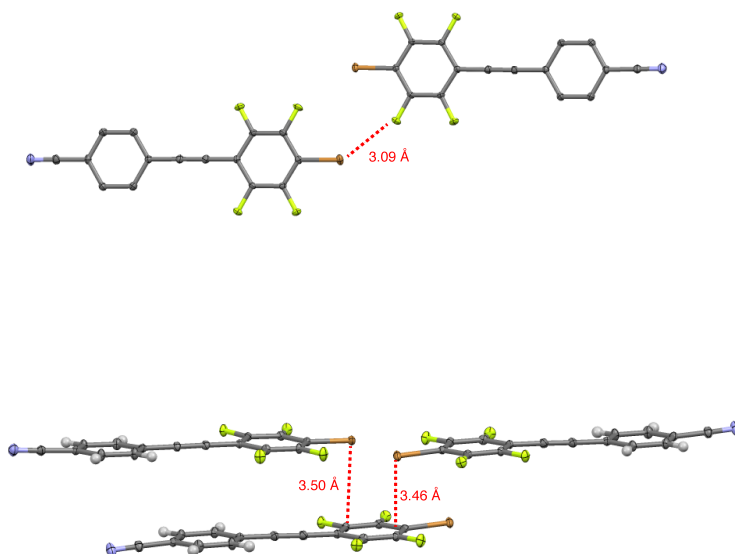

**Supplemental Figure S2.** X-ray crystal structure of **4**, highlighting significant interactions mentioned in the article text.

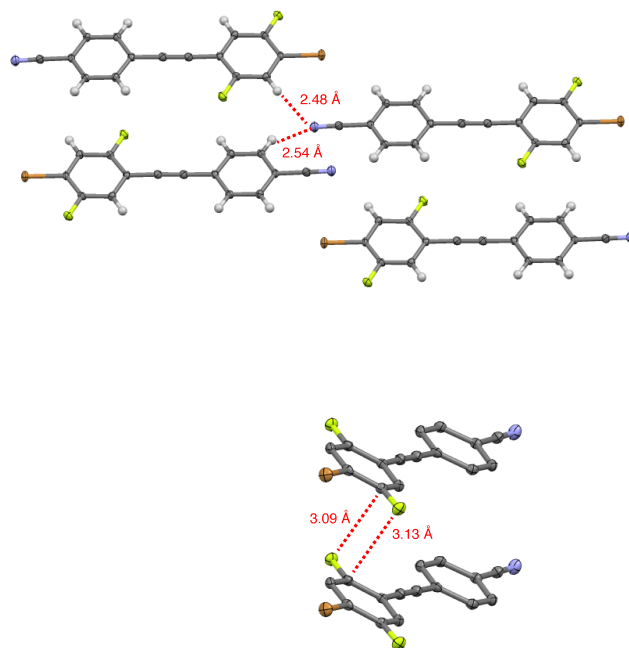

**Supplemental Figure S3:** Comparisons of X-ray powder diffractograms of compounds **1-6** with diffractograms calculated from single crystal structures.

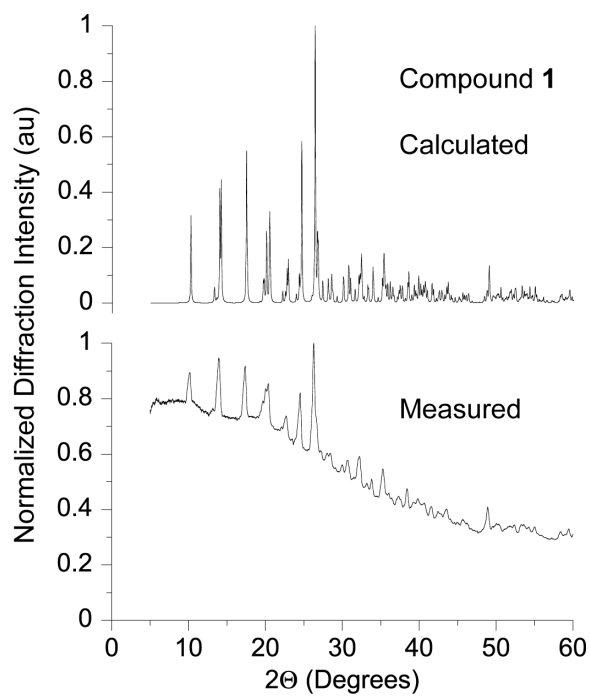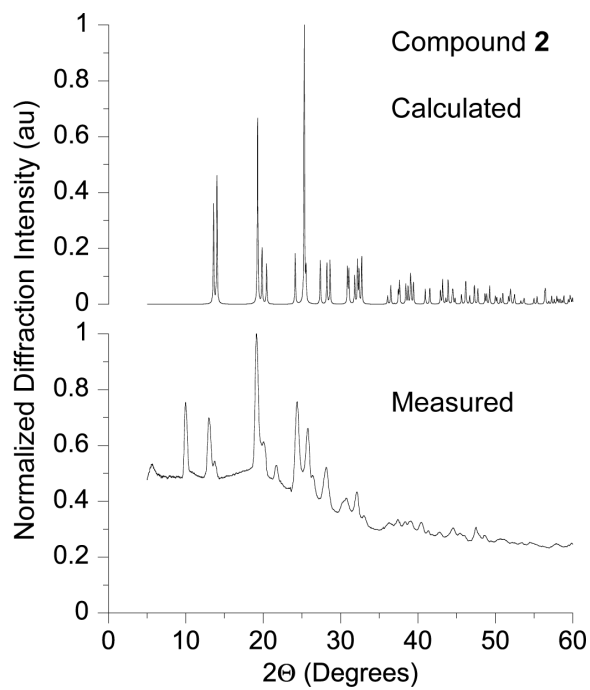

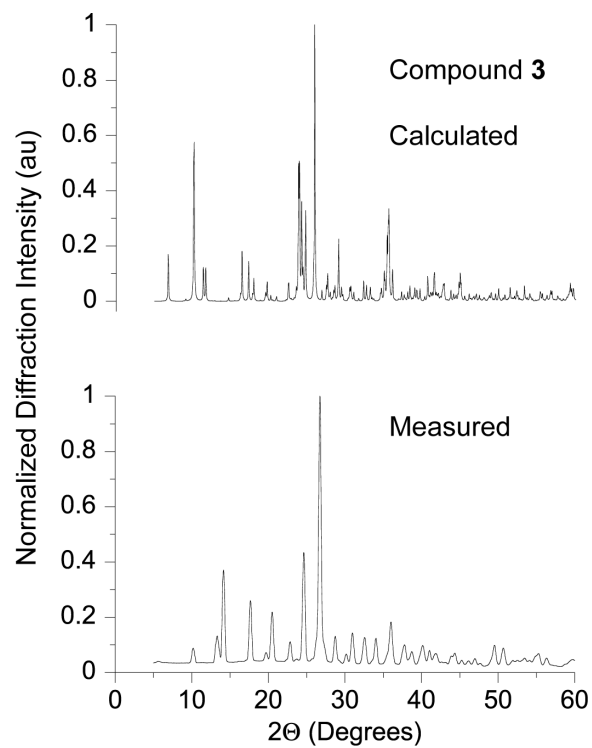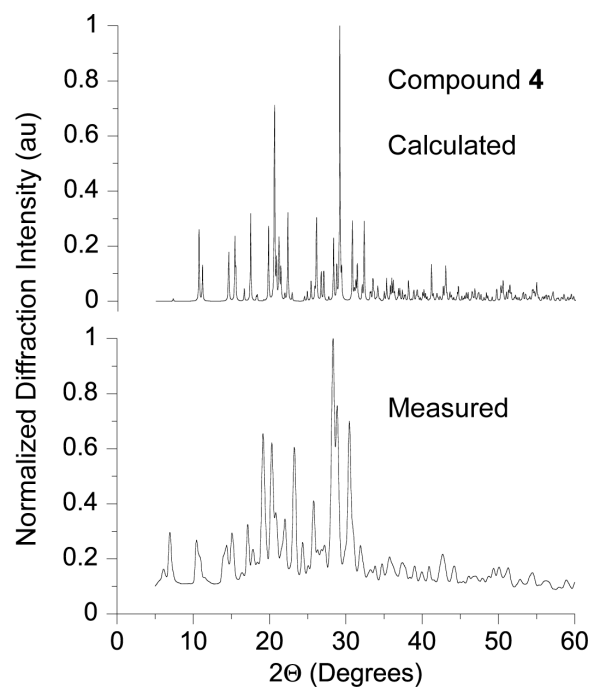

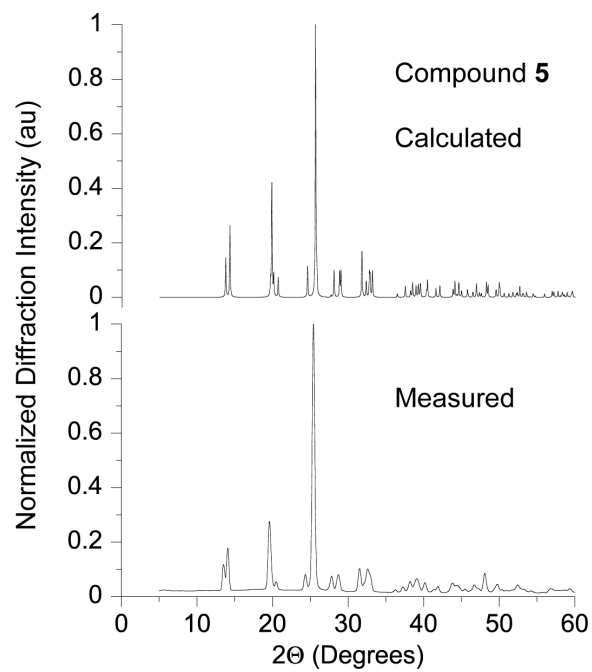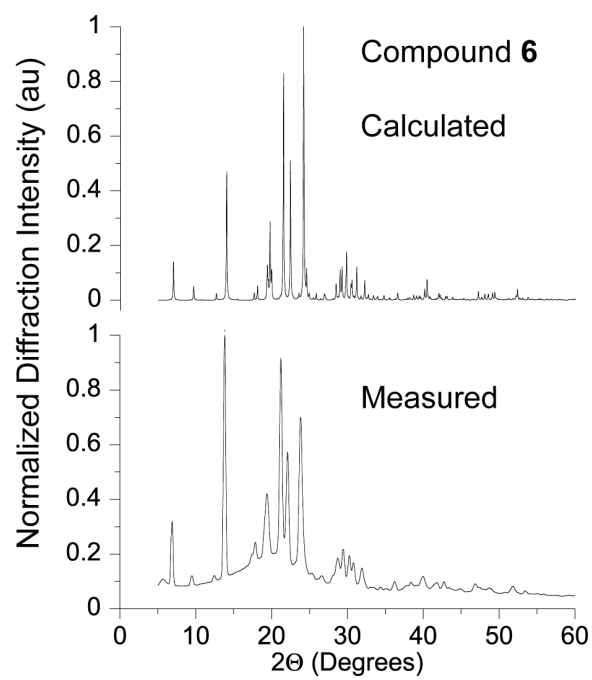

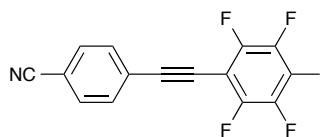

<sup>1</sup>H of NMR of **1**

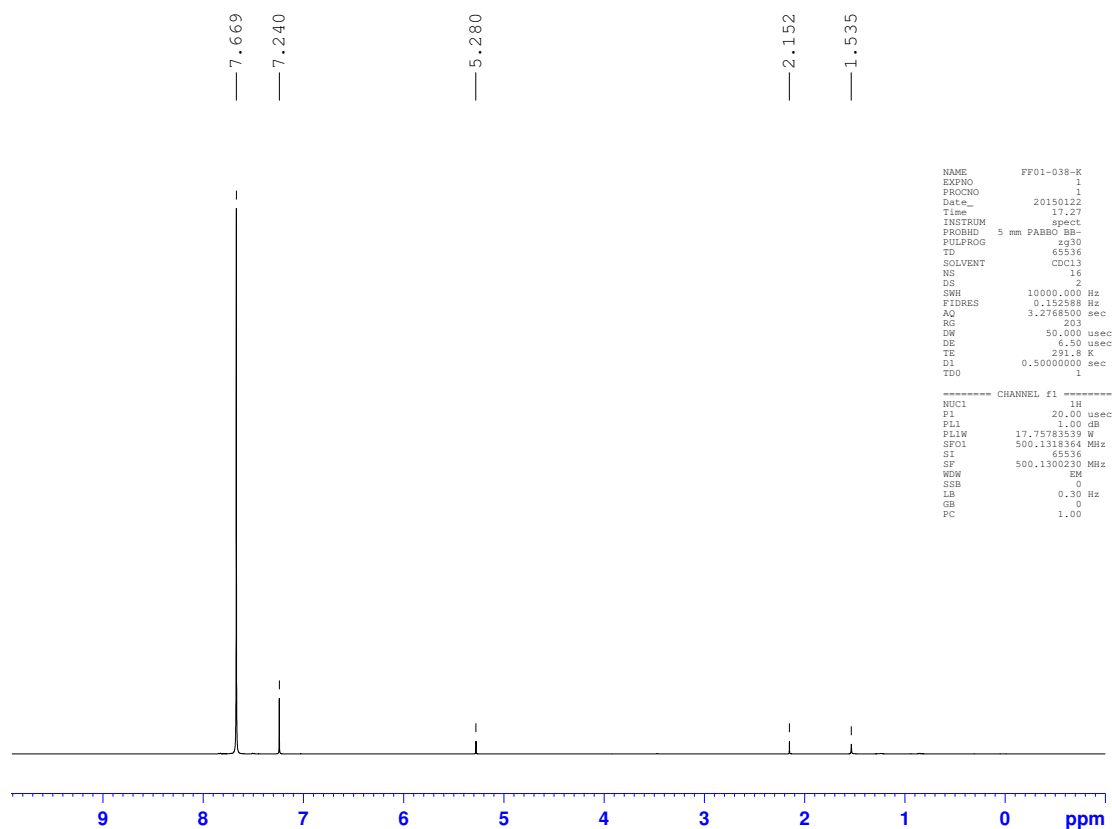

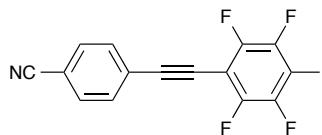

<sup>13</sup>C NMR Spectra of **1**

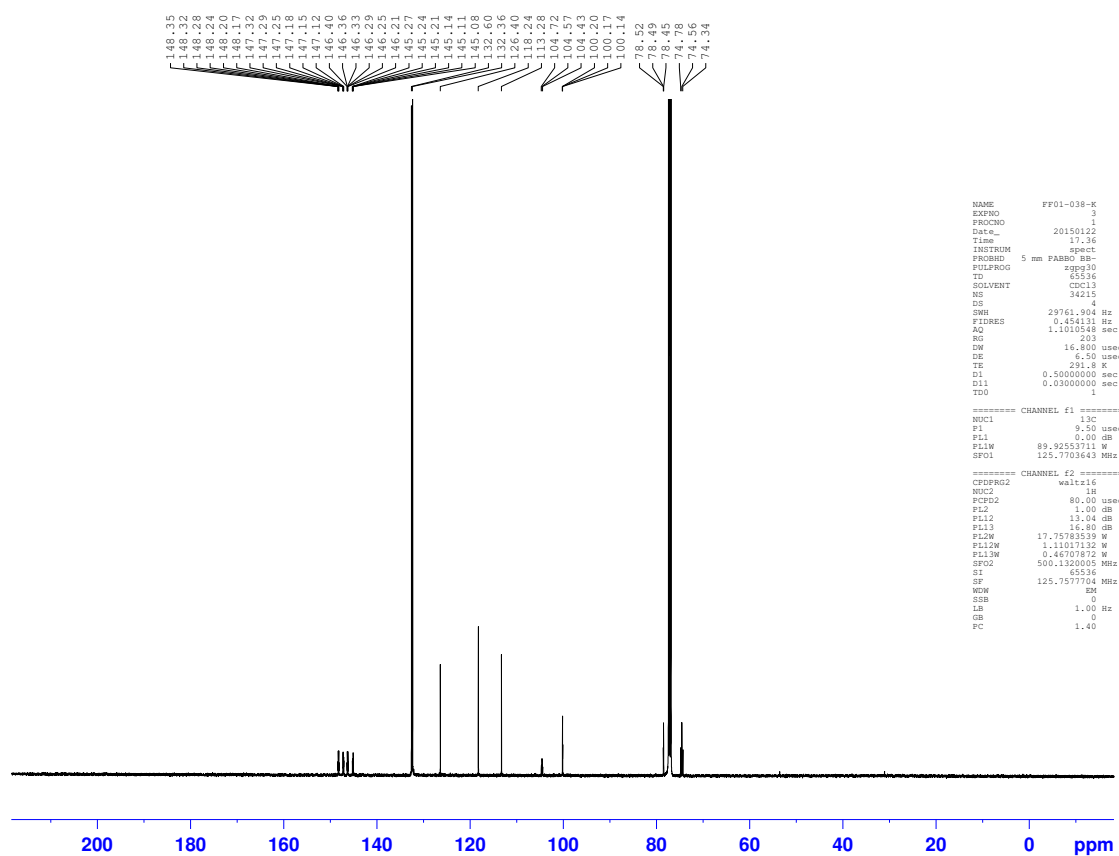

```

NAME      FF01-038-K
EXPNO     3
PROCNO    1
Date_     20150122
Time      17.36
INSTRUM   spect
PROBHD    5 mm F4BBO BB-
PULPROG   zgpg30
TD         65536
FIDRES    0.454131 Hz
AQ         1.11010548 sec
RG         203
SW         16.800 usec
DE         6.50 usec
TE         291.2 K
D1         0.50000000 sec
D11        0.03000000 sec
TD0        1

===== CHANNEL f1 =====
NUC1       13C
P1         9.50 usec
PL1        0.00 dB
PL1W       89.92553711 W
SFO1       125.7703643 MHz

===== CHANNEL f2 =====
CPDPRG2    waltz16
NUC2       1H
PCPD2      80.00 usec
PL2        1.00 dB
PL12       13.04 dB
PL13       14.80 dB
PL1W       17.75783539 W
PL12W      1.11017132 W
PL13W      0.46707872 W
SFO2       500.1320005 MHz
SI         65536
SF         125.7577704 MHz
WDW        RM
SSB        0
LB         1.00 Hz
GB         0
PC         1.40

```

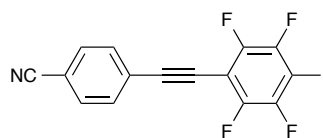

$^{19}\text{F}$  NMR Spectra of **1**

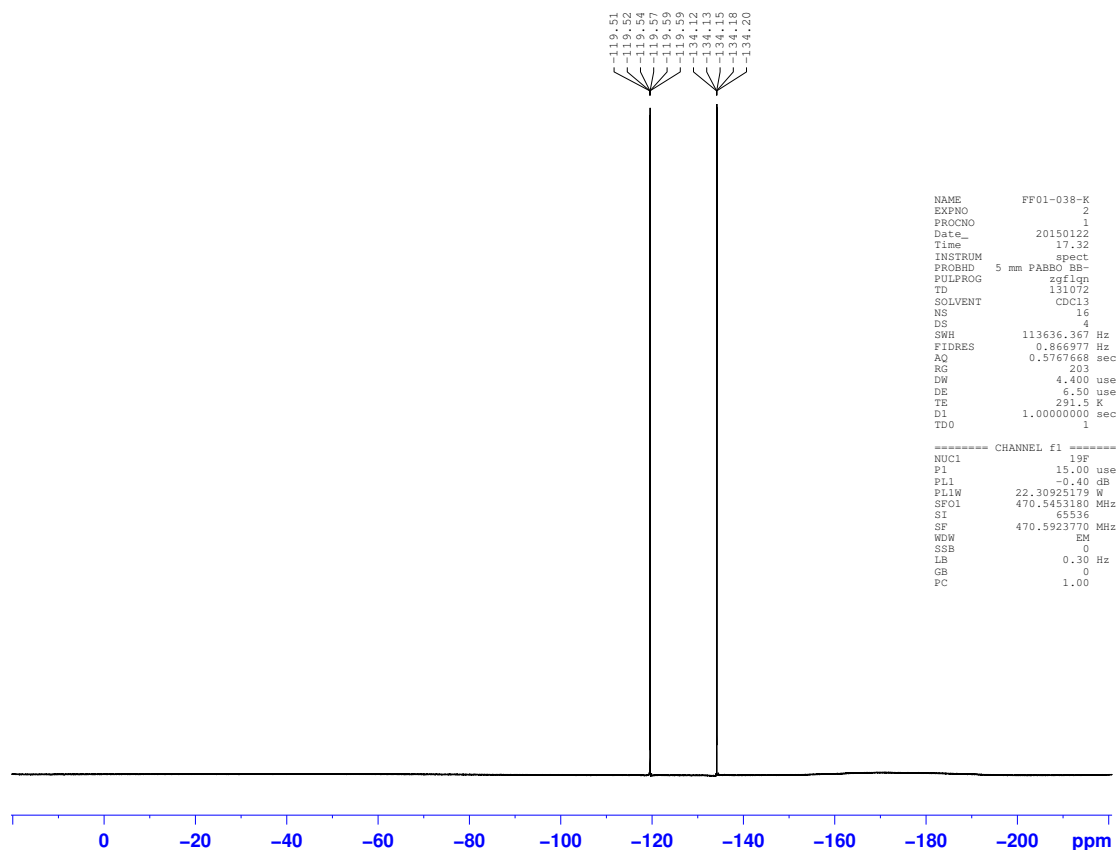

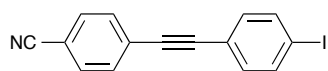

<sup>1</sup>H NMR of 2

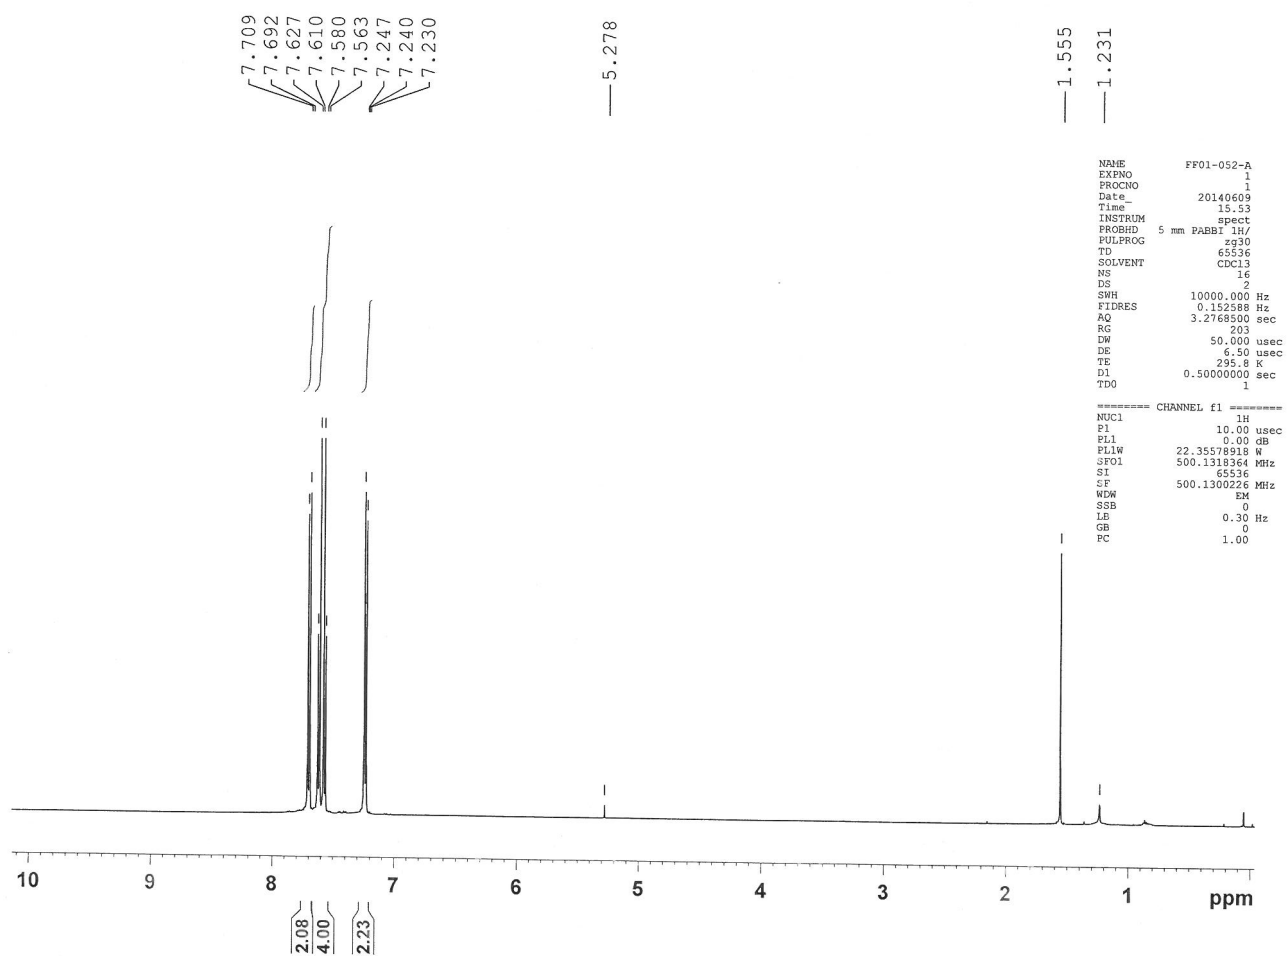

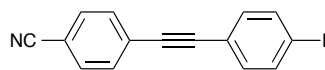

<sup>13</sup>C NMR of **2**

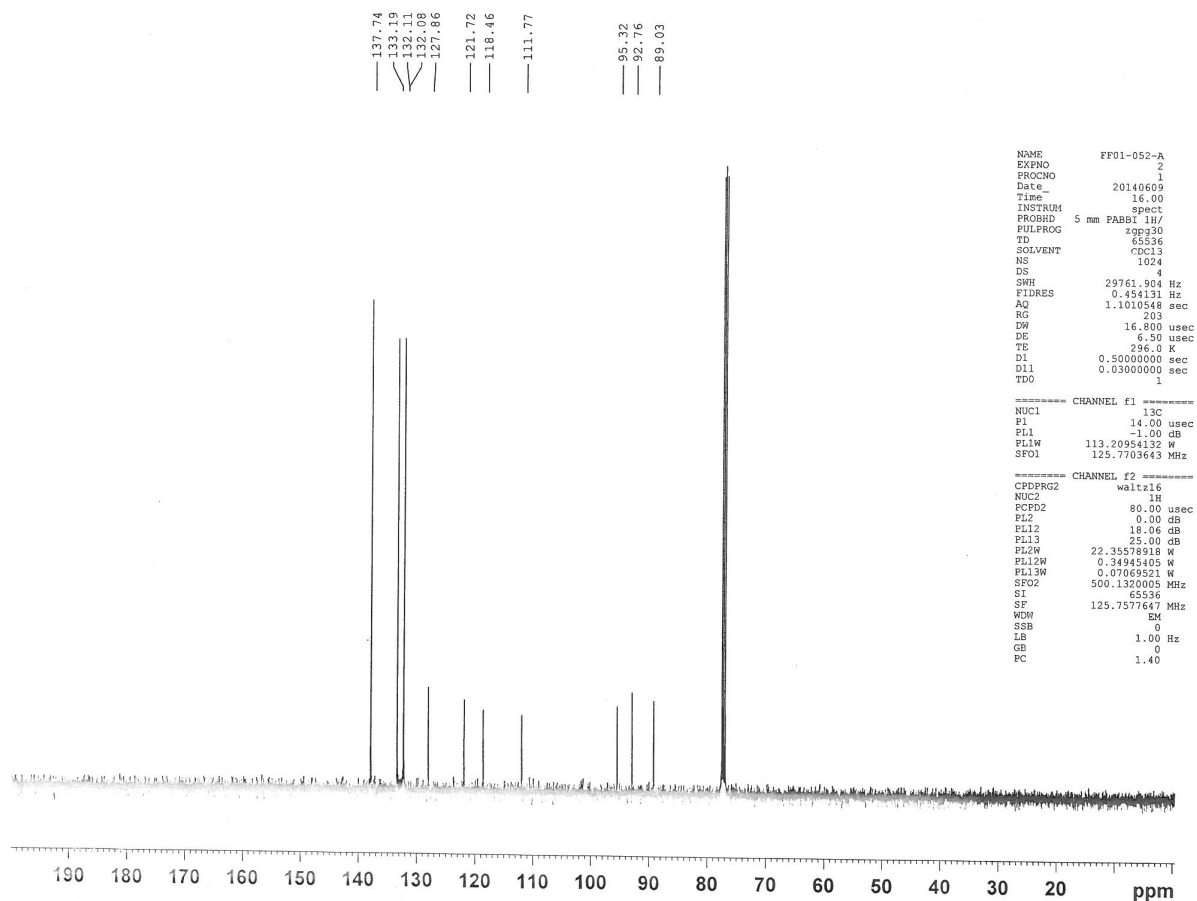

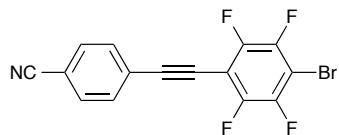

# <sup>1</sup>H NMR of **3**

FF-01-047-2 1H

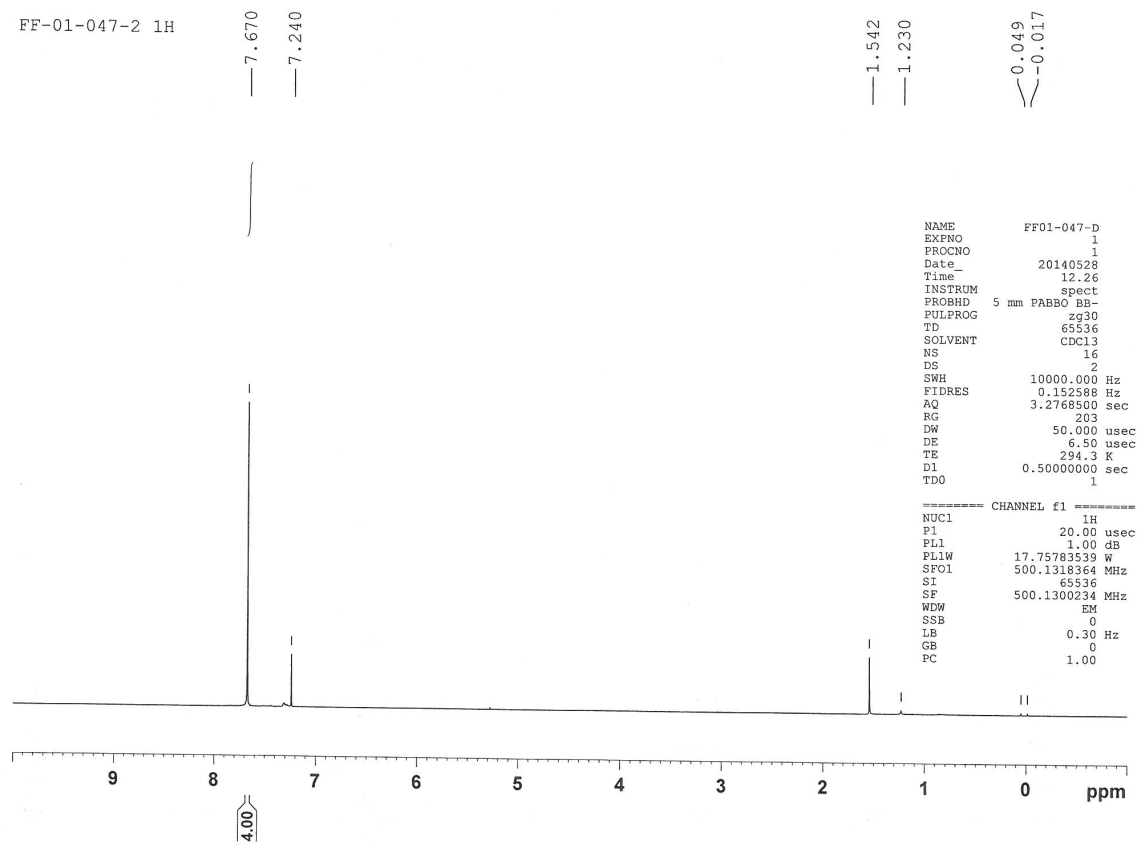

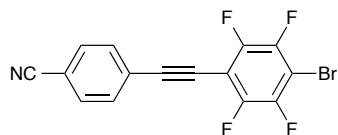

<sup>13</sup>C NMR of **3**

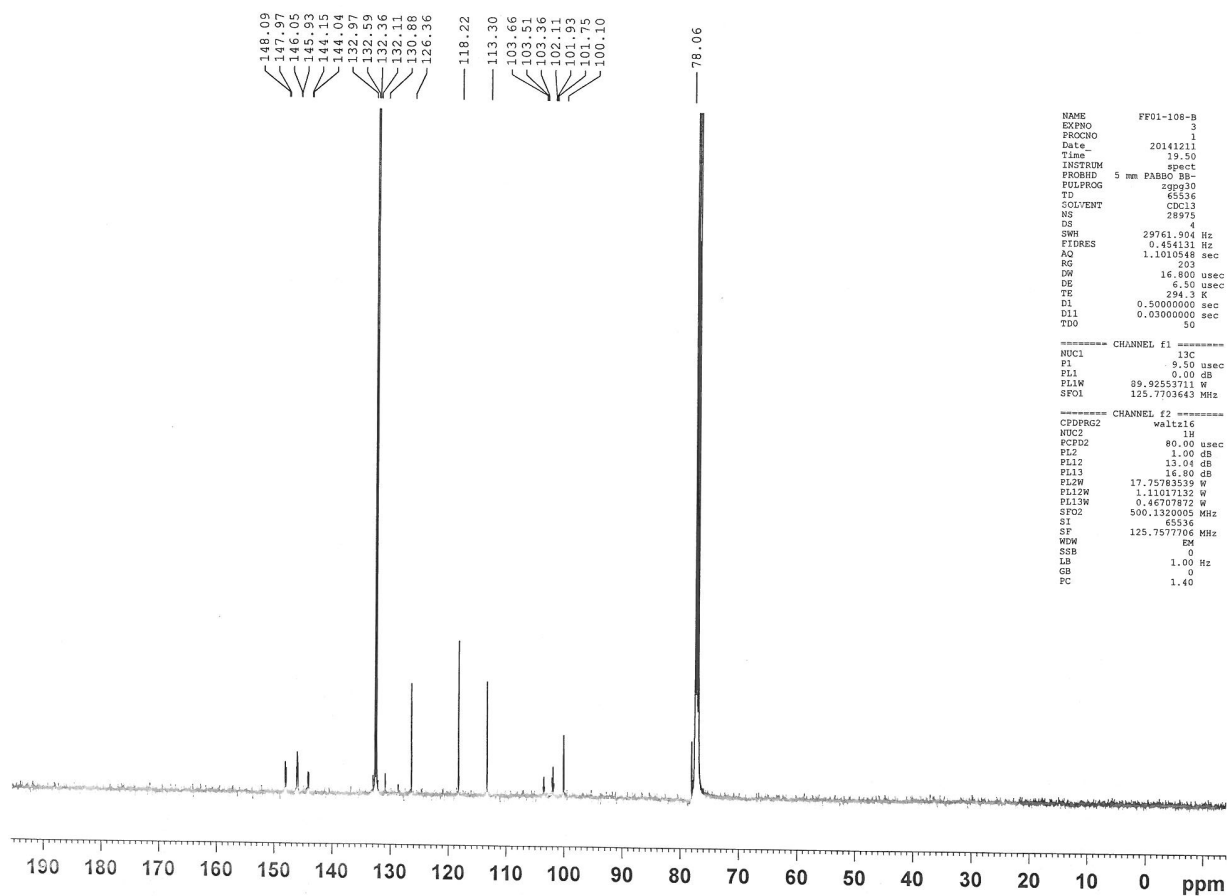



<sup>19</sup>F NMR of **3**

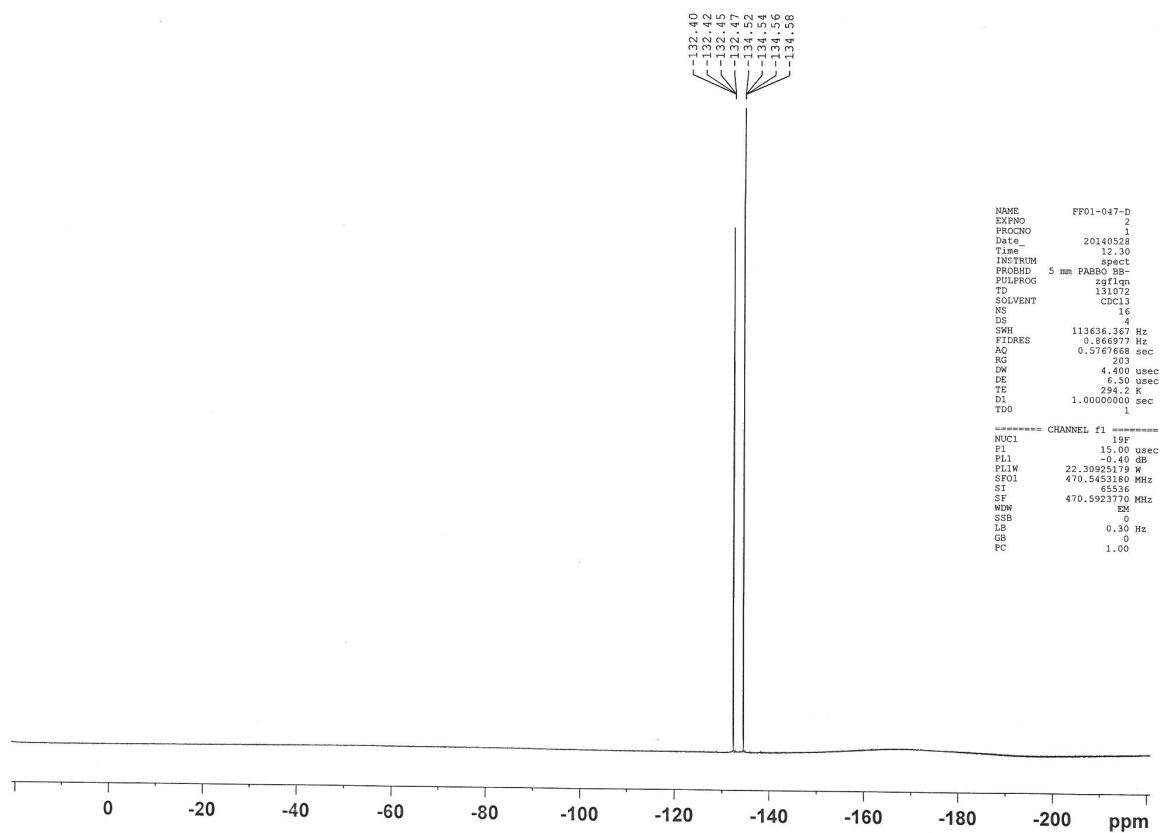

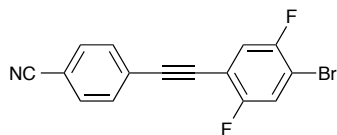

<sup>1</sup>H NMR of 4

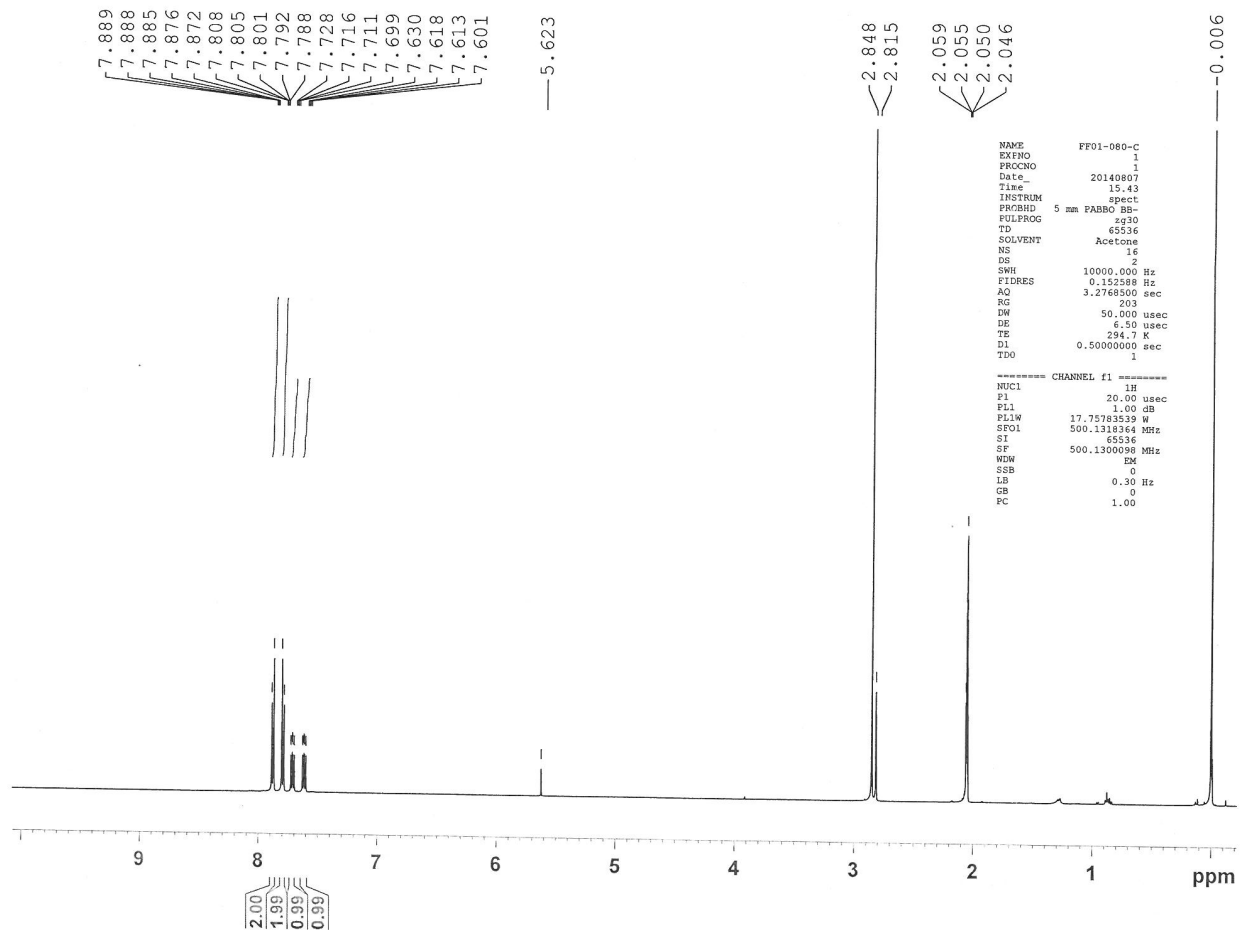

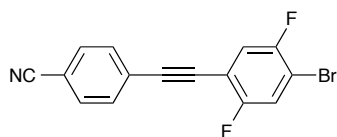

<sup>13</sup>C NMR of 4

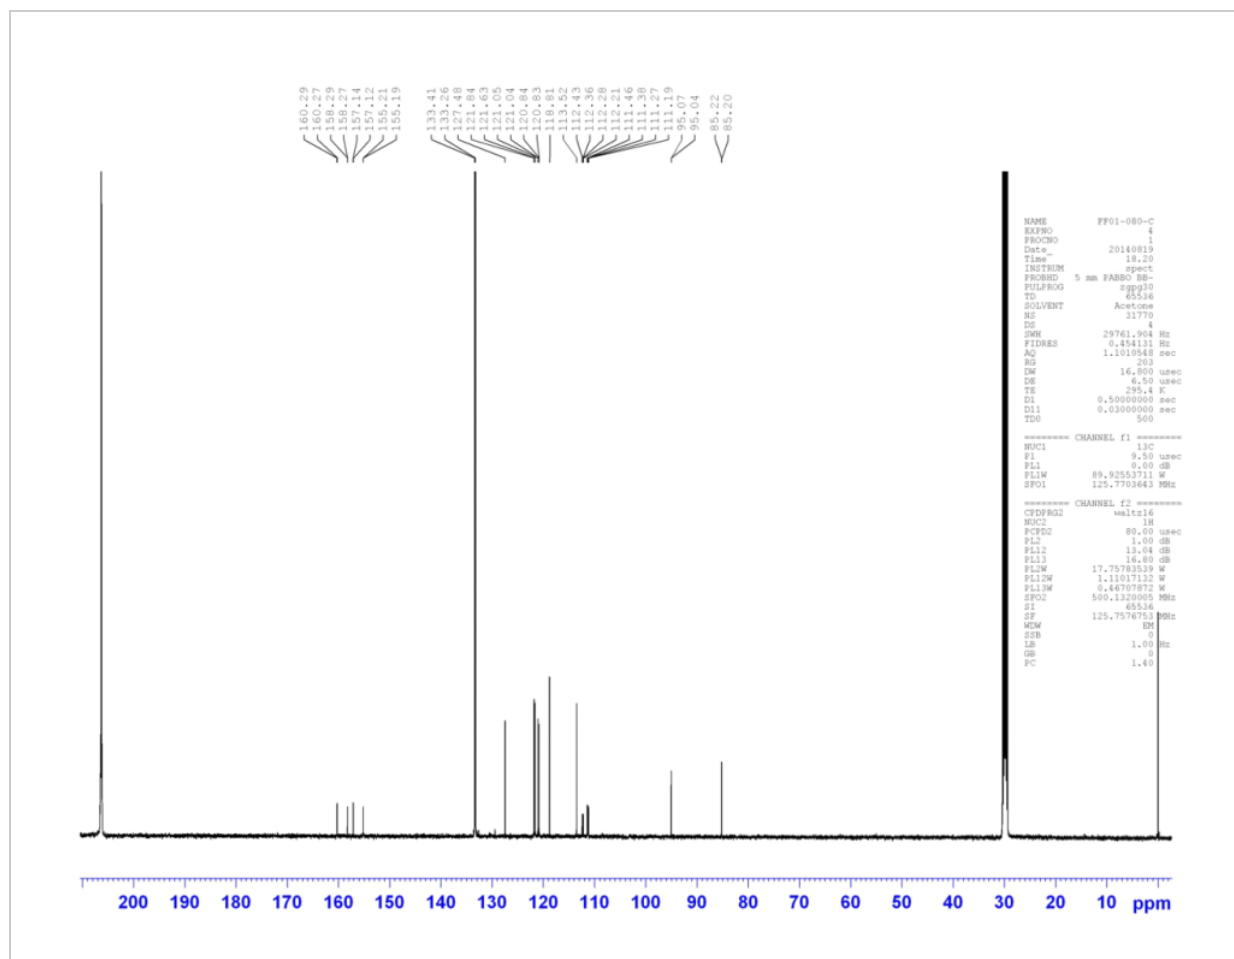



$^{19}\text{F}$  NMR of **4**

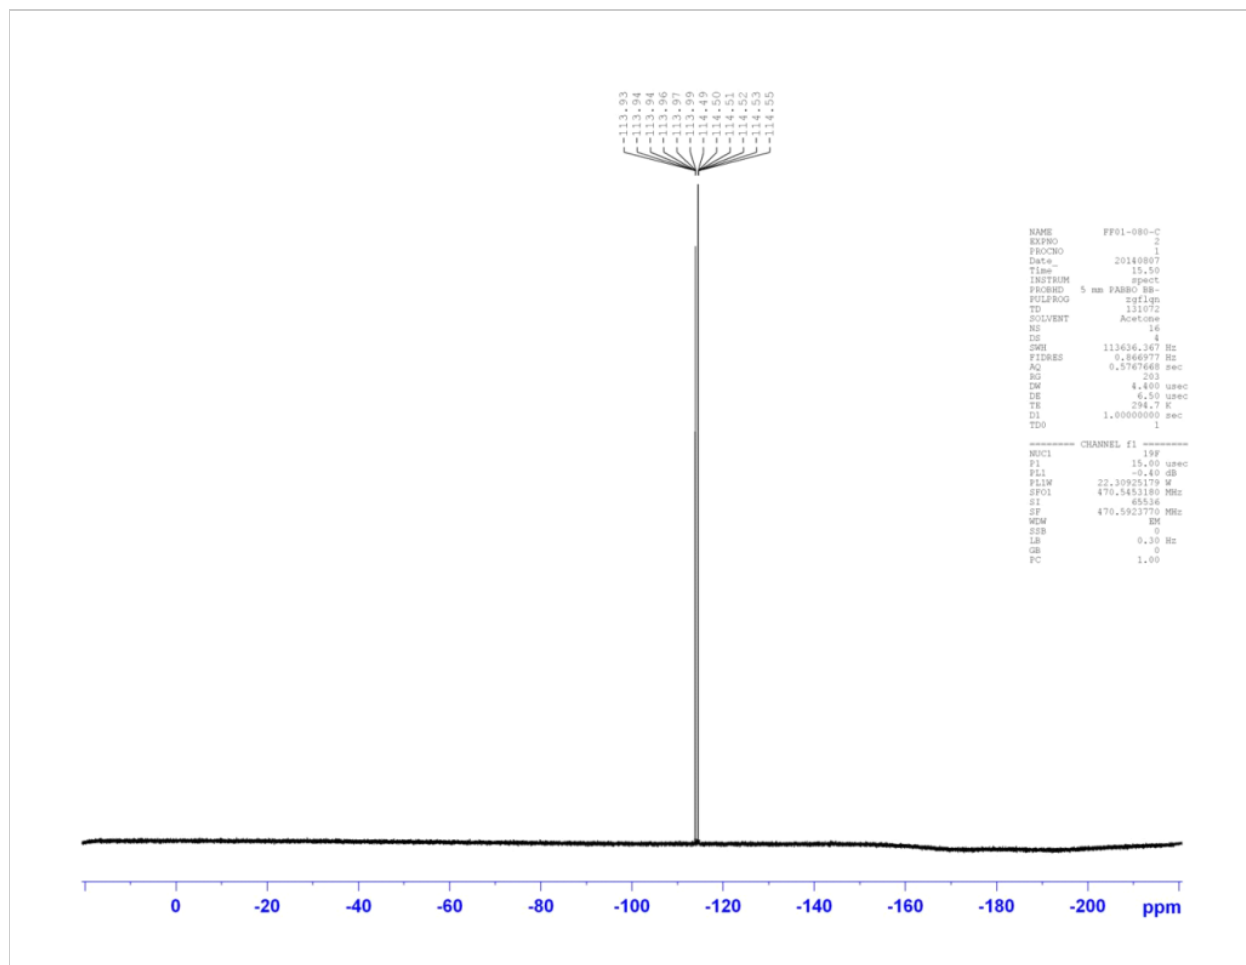

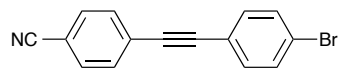

<sup>1</sup>H NMR of **5**

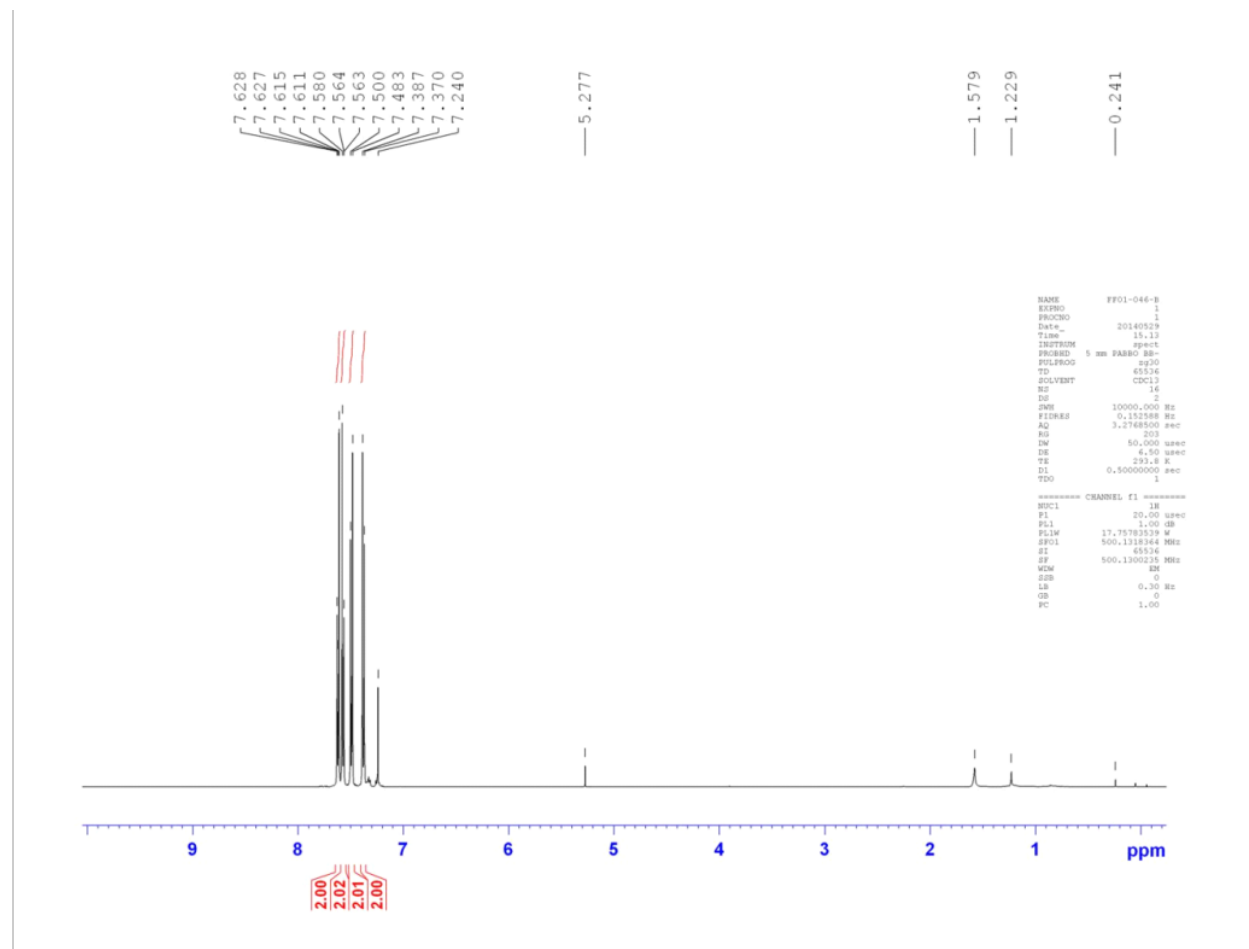

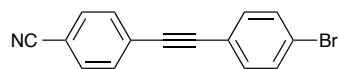

$^{13}\text{C}$  NMR of **5**

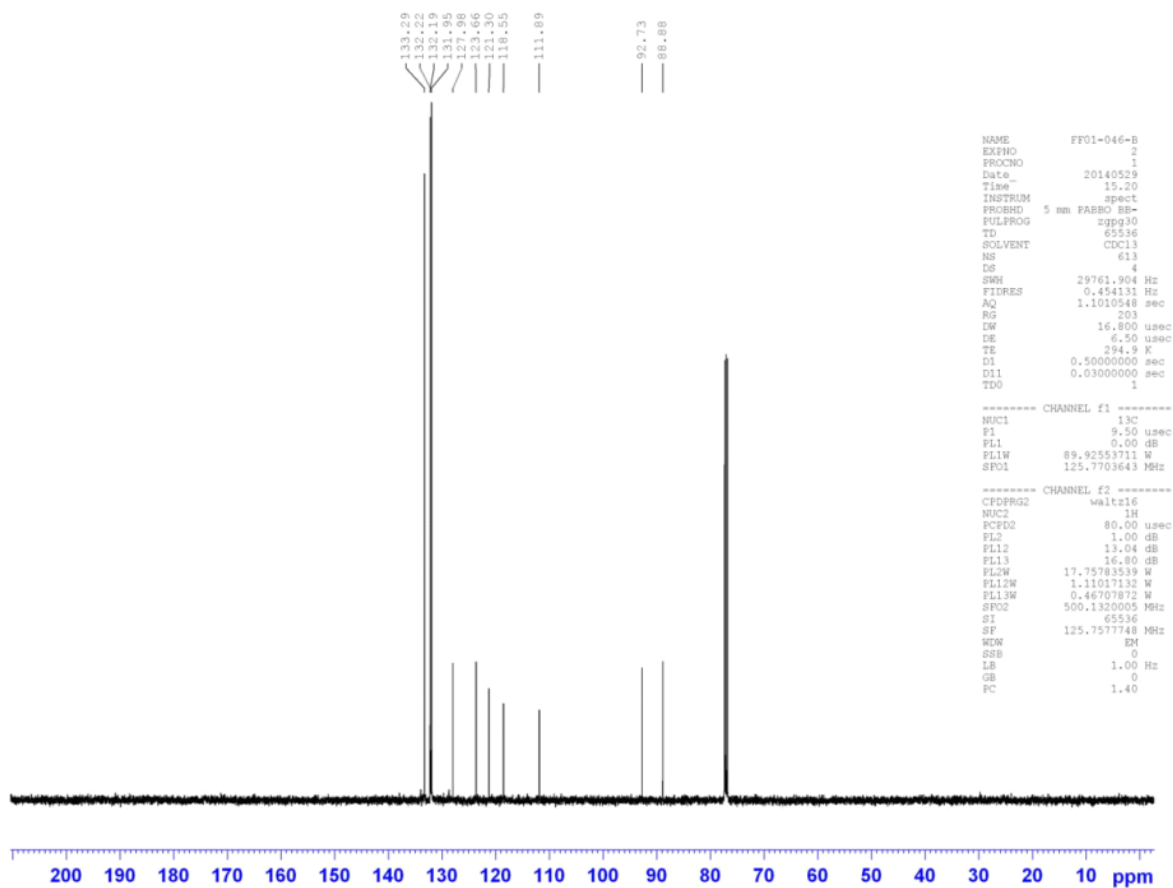

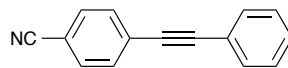

<sup>1</sup>H NMR of 6

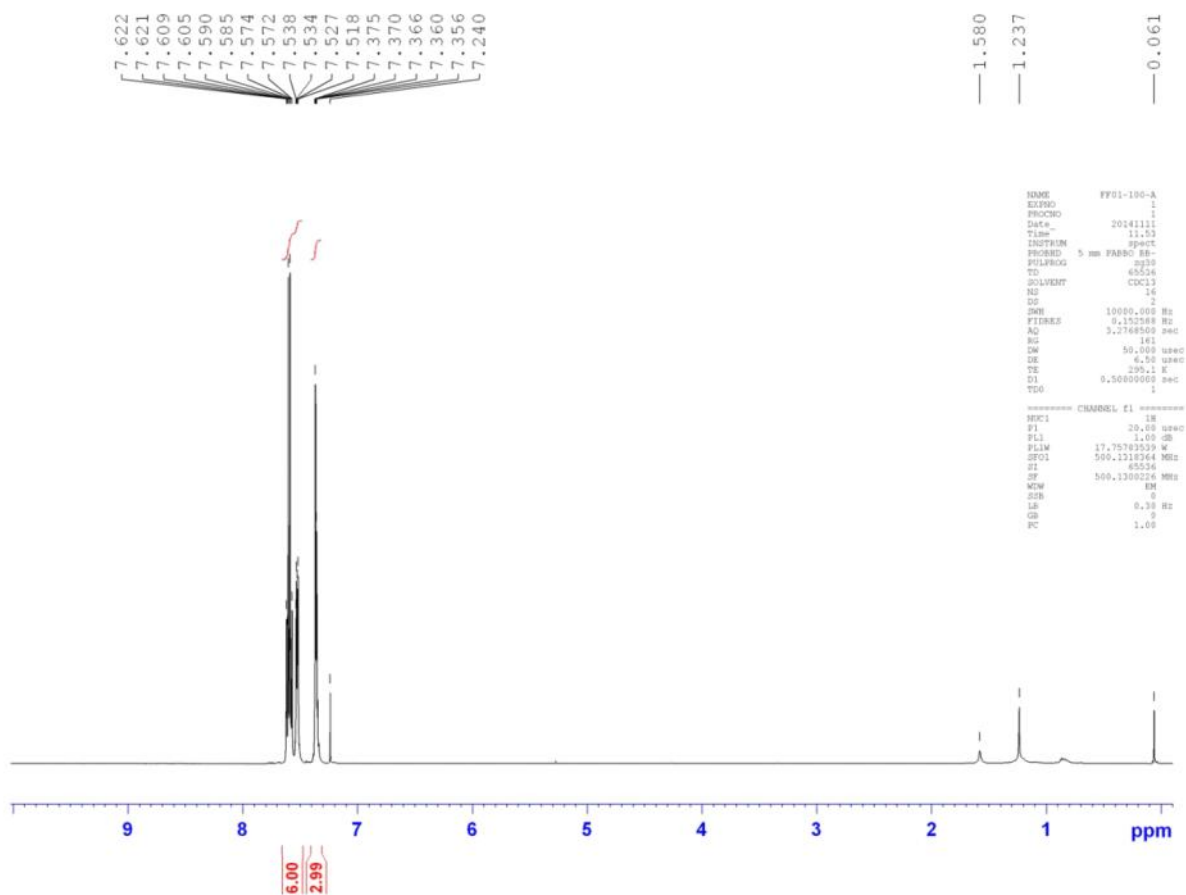

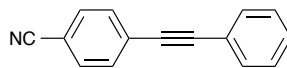

$^{13}\text{C}$  NMR of **6**

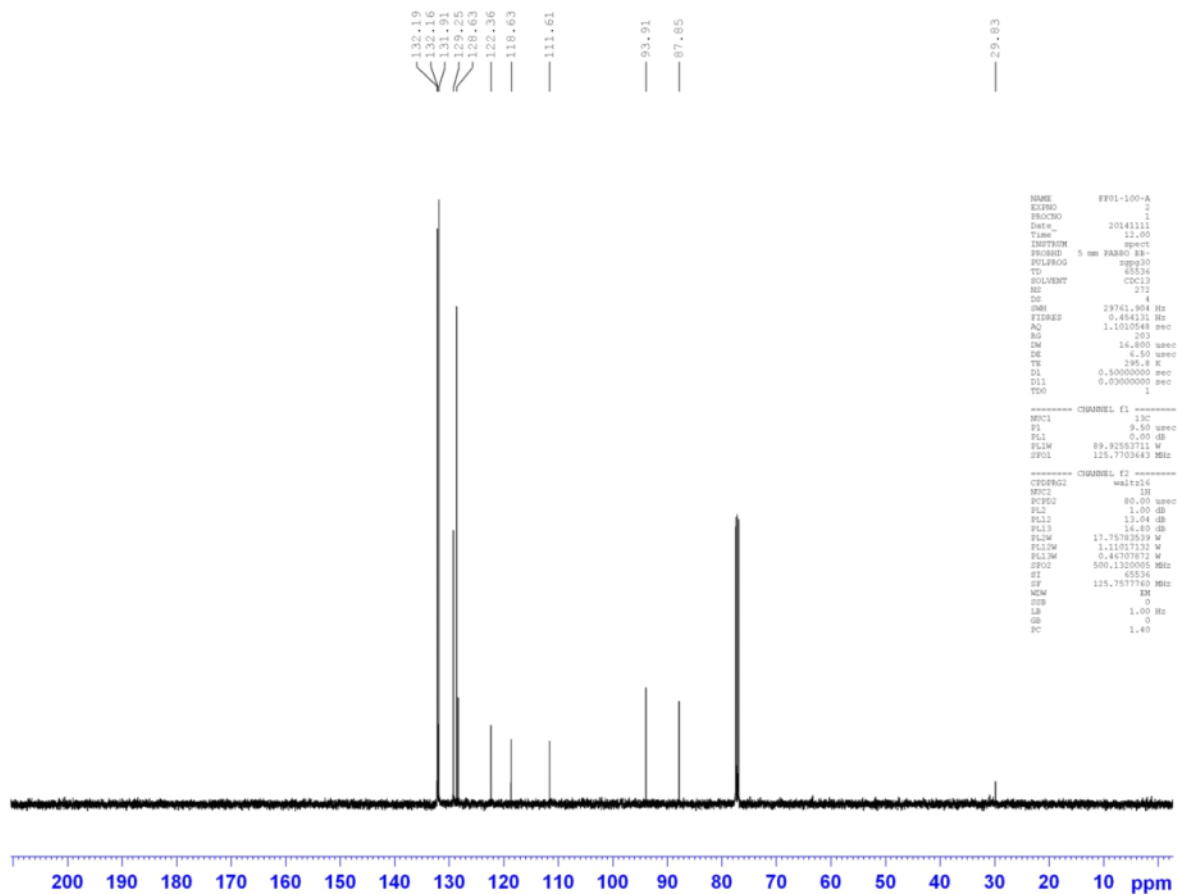

- 
- <sup>1</sup> Sheldrick, G.M., *Acta Crystallogr. A* **1990**, *A46*, 467-473.
- <sup>2</sup> Sheldrick, G.M., *Acta Crystallogr. A* **2008**, *A64*, 112-122.
- <sup>3</sup> Mueller, P., *Crystallogr. Rev.* **2009**, *15*, 57-83.
- <sup>4</sup> Sheldrick, G. M. (2008). *CELL\_NOW*. Version 2008/4. Georg-August-Universität Göttingen, Göttingen, Germany.
- <sup>5</sup> Sheldrick, G. M. (2012). *TWINABS*. Version 2012/1. Georg-August-Universität Göttingen, Göttingen, Germany.
- <sup>6</sup> Gaussian 09, R. D., Frisch, M. J.; Trucks, G. W.; Schlegel, H. B.; Scuseria, G. E.; Robb, M. A.; Cheeseman, J. R.; Scalmani, G.; Barone, V.; Mennucci, B.; Petersson, G. A.; Nakatsuji, H.; Caricato, M.; Li, X.; Hratchian, H. P.; Izmaylov, A. F.; Bloino, J.; Zheng, G.; Sonnenberg, J. L.; Hada, M.; Ehara, M.; Toyota, K.; Fukuda, R.; Hasegawa, J.; Ishida, M.; Nakajima, T.; Honda, Y.; Kitao, O.; Nakai, H.; Vreven, T.; Montgomery, J. A., Jr.; Peralta, J. E.; Ogliaro, F.; Bearpark, M.; Heyd, J. J.; Brothers, E.; Kudin, K. N.; Staroverov, V. N.; Kobayashi, R.; Normand, J.; Raghavachari, K.; Rendell, A.; Burant, J. C.; Iyengar, S. S.; Tomasi, J.; Cossi, M.; Rega, N.; Millam, N. J.; Klene, M.; Knox, J. E.; Cross, J. B.; Bakken, V.; Adamo, C.; Jaramillo, J.; Gomperts, R.; Stratmann, R. E.; Yazyev, O.; Austin, A. J.; Cammi, R.; Pomelli, C.; Ochterski, J. W.; Martin, R. L.; Morokuma, K.; Zakrzewski, V. G.; Voth, G. A.; Salvador, P.; Dannenberg, J. J.; Dapprich, S.; Daniels, A. D.; Farkas, Ö.; Foresman, J. B.; Ortiz, J. V.; Cioslowski, J.; Fox, D. J. Gaussian, Inc., Wallingford CT, 2009.
- <sup>7</sup> Zhou, N.; Wang, L.; Thompson, D. W.; Zhao, Y. *Tetrahedron* **2011**, *67*, 125–143.
- <sup>8</sup> Piao, M. J.; Chajara, K.; Yoon, S. J.; Kim, H. M.; Jeon, S.-J.; Kim, T.-H.; Song, K.; Asselberghs, I.; Persoons, A.; Clays, K.; Cho, B. R. *J. Mater. Chem.* **2006**, *16*, 2273–2281.
- <sup>9</sup> Fang, J.-K.; An, D.-L.; Wakamatsu, K.; Ishikawa, T.; Iwanaga, T.; Toyota, S.; Akita, S.; Matsuo, D.; Orita, A.; Otera, J. *Tetrahedron* **2010**, *66*, 5479–5485.
- <sup>10</sup> Fuji, K.; Morimoto, T.; Tsutsumi, K.; Kakiuchi, K. *Chem. Commun. (Camb)*. **2005**, 3295–3297.
